# Supplementary material for: A bioinspired pseudopeptide-based intracellular delivery platform enhances the cytotoxicity of a ribosome-inactivating protein through multiple death pathways
Source: Royal Society of Chemistry journal article supplement (doi:10.1039/d4bm00600c), 2024-01-01
Supplement: d4bm00600c1.pdf [file d4bm00600c1.pdf]

## Supplementary Information

# A Bioinspired Pseudopeptide-based Intracellular Delivery Platform Enhances the Cytotoxicity of a Ribosome-inactivating Protein through Multiple Death Pathways

*Gabriella Morrison, Nicole Henry, Michal Kopytynski and Rongjun Chen\**

Department of Chemical Engineering, Imperial College London, South Kensington Campus,  
London, SW7 2AZ, United Kingdom

\*Corresponding author:

Email: [rongjun.chen@imperial.ac.uk](mailto:rongjun.chen@imperial.ac.uk)

Tel: +44 (0)20 7594 2070

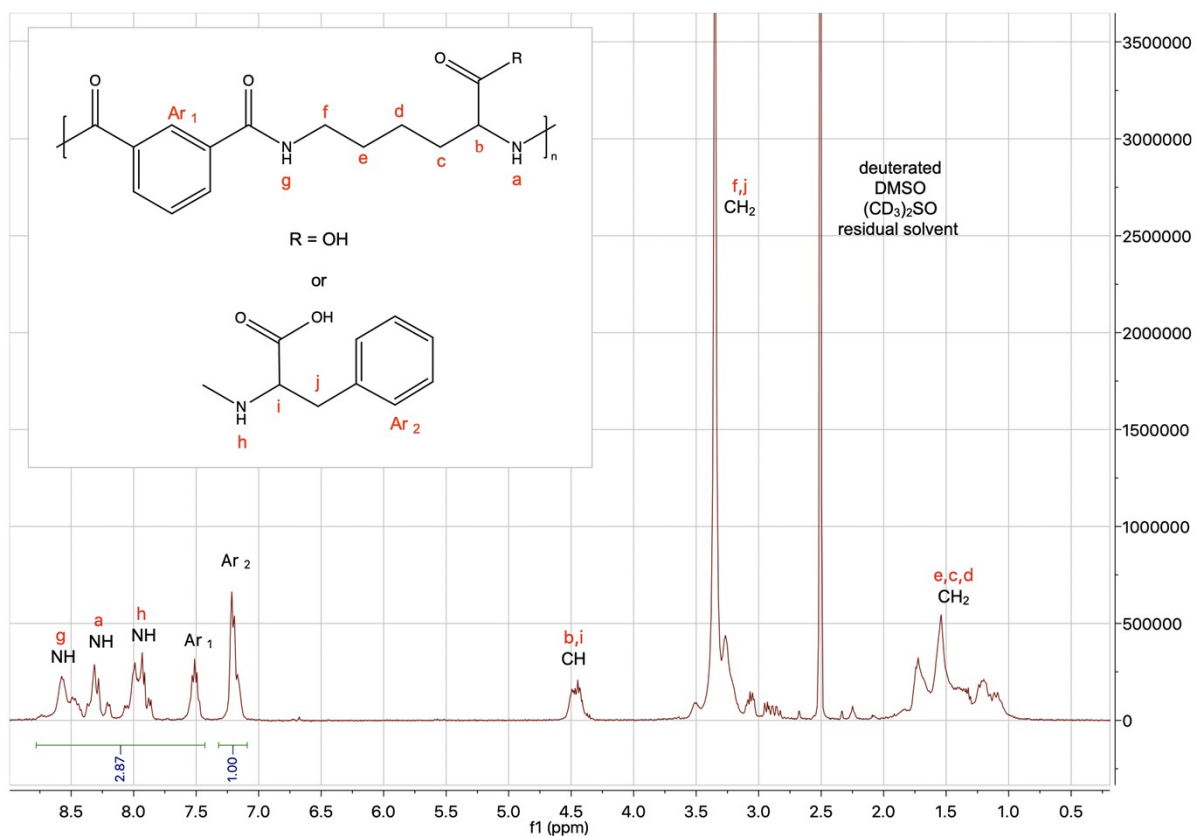

**Figure S1.** Chemical structure and  $^1\text{H}$ -NMR spectrum of PP50 in acidic form in  $d_6$ -DMSO at room temperature.

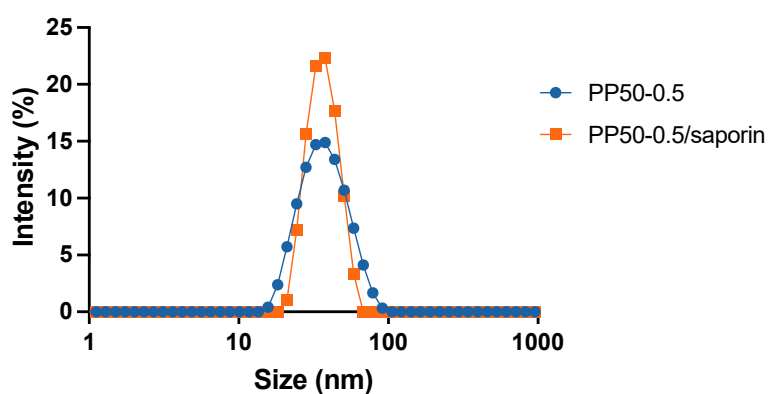

| Sample           | Diameter (nm) | PDI           |
|------------------|---------------|---------------|
| PP50-0.5         | 39.2 ± 8.1    | 0.210 ± 0.029 |
| PP50-0.5/saporin | 45.5 ± 11.5   | 0.253 ± 0.018 |

**Figure S2.** The hydrodynamic size distributions and the summary table of particle diameters of PP50-0.5 and PP50-0.5/saporin at pH 6.5, respectively, measured by dynamic light scattering ([PP50] = 0.5 mg mL<sup>-1</sup>; [Saporin] = 1 nM). Mean results ± SD (n=3).

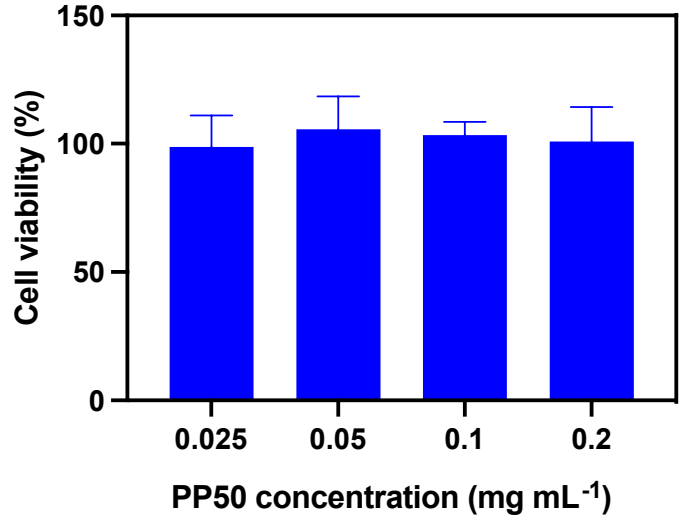

**Figure S3.** Effects of PP50 at varying concentrations on viability of A549 cells. Cell viability was determined using the CellTiter-Glo® 2.0 Cell Viability Assay after 1 h treatment plus 72 h further incubation in DMEM. Mean results  $\pm$  SD (n=3).

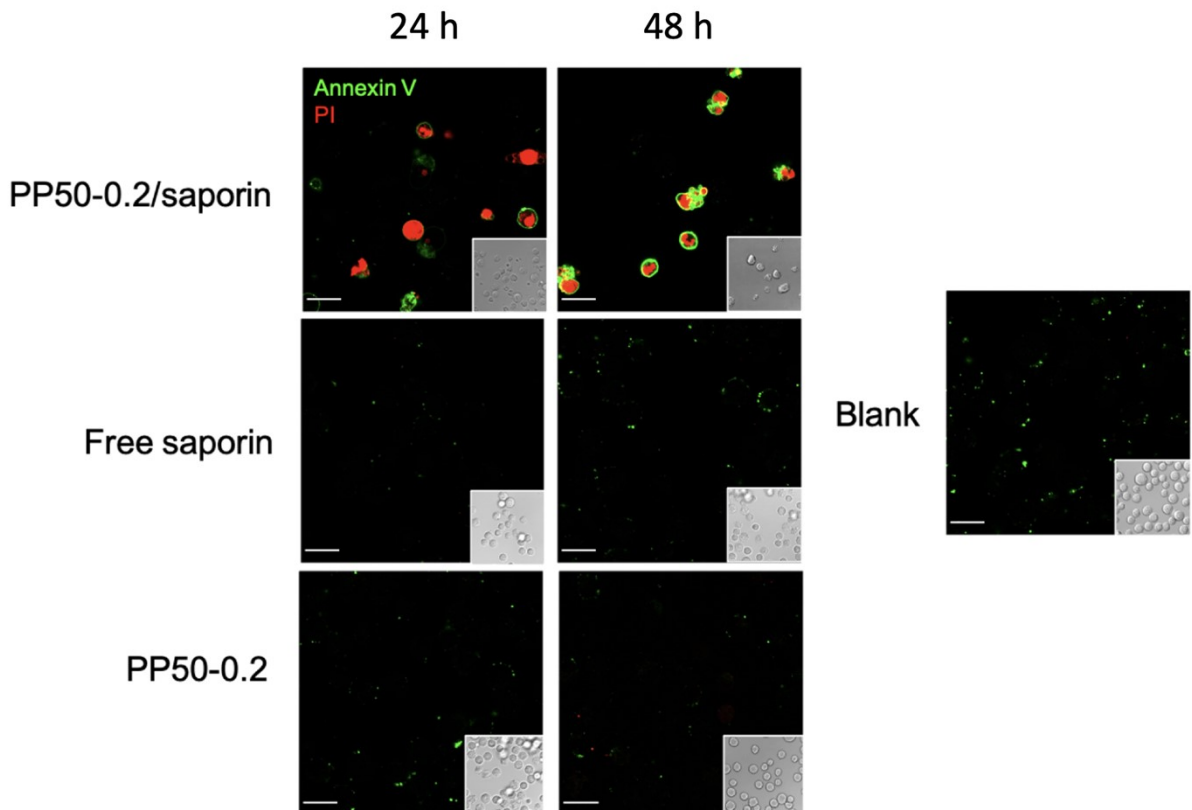

**Figure S4.** Fluorescence and phase contrast microscopy analysis of Annexin V/PI double staining of A549 cells after exposure to saporin (1 nM) in the presence or absence of PP50-0.2 after 1 h treatment plus 24 or 48 h further incubation in DMEM. Scale bar 20  $\mu$ m.

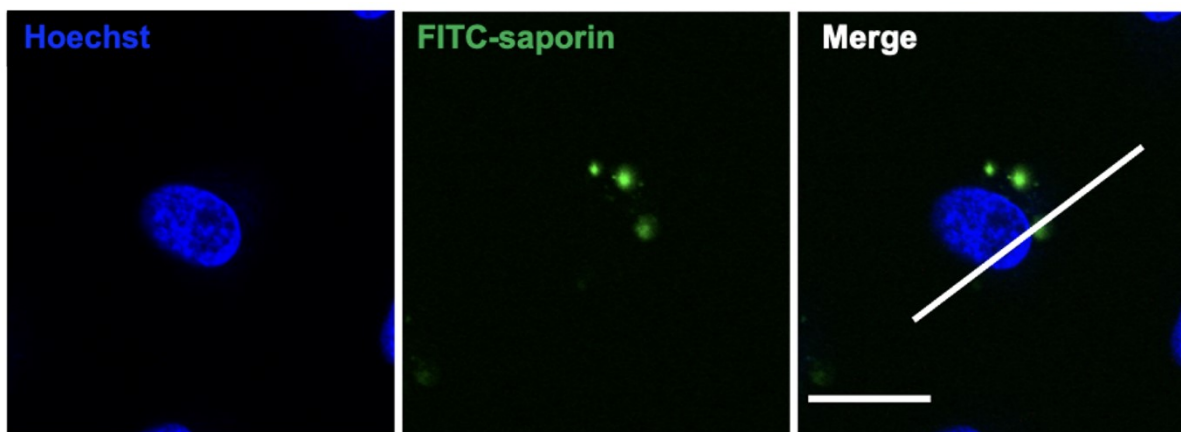

**Figure S5.** Confocal microscopy images illustrating the intracellular localization in A549 after 1 h treatment with free FITC-saporin ( $125 \mu\text{g mL}^{-1}$ ) plus 24 h further incubation in DMEM. The cell nucleus was counterstained with Hoechst 33342. Scale bar 20  $\mu\text{m}$ .

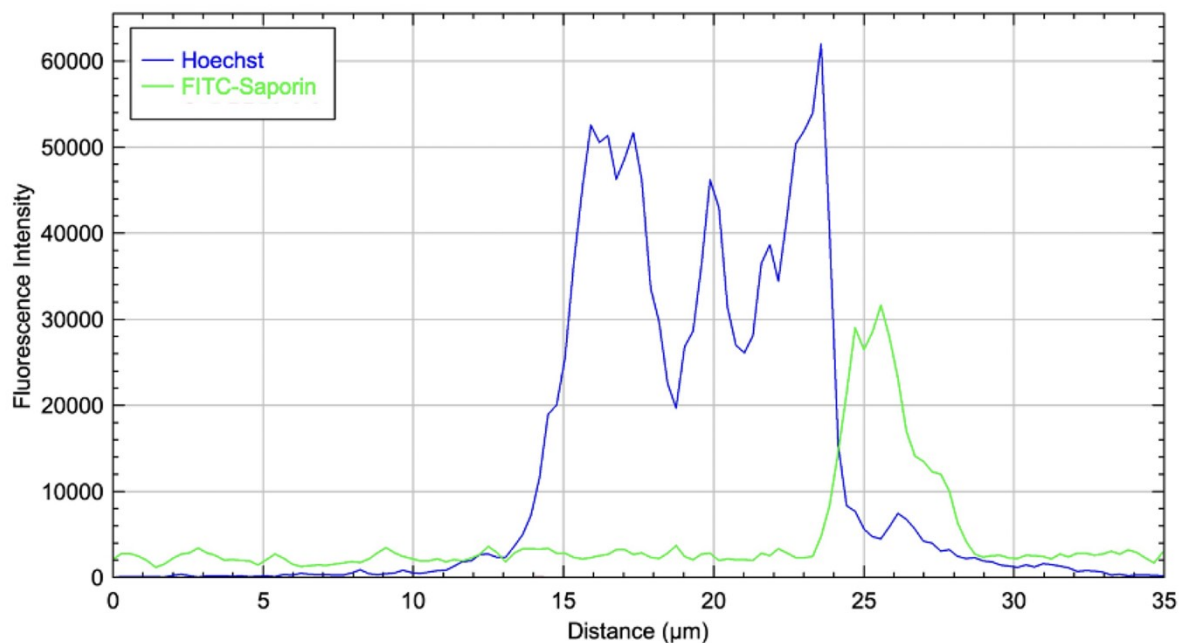

**Figure S6.** Fluorescence intensity profiles of A549 cells after 1 h treatment with free FITC-saporin ( $125 \mu\text{g mL}^{-1}$ ) plus 24 h further incubation in DMEM, produced from the cross section along the white line in Figure S4.

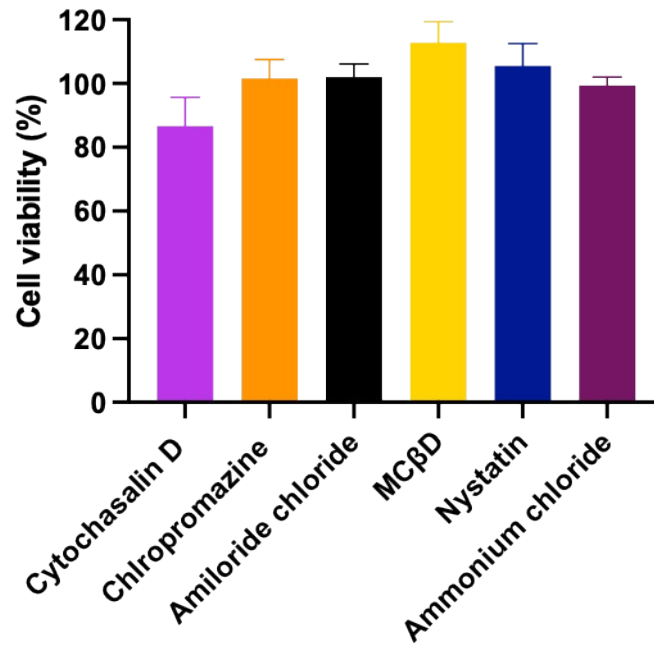

**Figure S7.** Cell viabilities after inhibitor treatment. A549 cells were pre-incubated with the specific inhibitor for 30 min. Cell viability was determined using the CellTiter-Glo<sup>®</sup> 2.0 Cell Viability Assay after 1 h treatment with corresponding inhibitor plus 72 h further incubation. Mean results  $\pm$  SD (n = 4).
